# Supplementary material
Source: publisher site journal article supplement (https://www.dovepress.com/article/530424)
Supplement: Supplementary file 1 [file 530424%20Supplementary%20Table%20S1.docx]

**Supplementary Table S1.** Comparison of baseline characteristics of elderly adults with T2DM (N = 2388).

| Parameters | Total  (N = 2388) | Derivation  (N = 1340) | Internal Validation  (N = 572) | External Validation  (N = 476) | *p*-value |
| --- | --- | --- | --- | --- | --- |
| Age (years) | 67.0 (63.0, 72.0) | 66.00 (63.00,71.00) | 67.00 (63.00,72.00) | 67.00 (63.00,71.15) | 0.476 |
| Gender |  |  |  |  |  |
| Male | 1293 (54.1%) | 715 (53.4%) | 308 (53.8%) | 270 (56.7%) | 0.845 |
| Female | 1095 (45.9%) | 625 (46.6%) | 264 (46.2%) | 206 (43.3%) |  |
| BMI (kg/m2) |  |  |  |  |  |
| < 25.0 | 1220 (51.1%) | 676 (50.4%) | 306 (53.5%) | 238 (50.0%) | 0.700 |
| 25.0-29.9 | 934 (39.1%) | 532 (39.7%) | 215 (37.6%) | 187 (39.3%) |  |
| ≥ 30.0 | 234 (9.8%) | 132 (9.9%) | 51 (8.9%) | 51 (10.7%) |  |
| Location |  |  |  |  |  |
| Urban | 1147 (48.0%) | 645 (48.1%) | 272 (47.6%) | 230 (48.3%) | 0.964 |
| Rural | 1241 (52.0%) | 695 (51.9%) | 300 (52.4%) | 246 (51.7%) |  |
| Alcohol consumption (yes) | 701 (29.4%) | 383 (28.6%) | 168 (29.4%) | 150 (31.5%) | 0.483 |
| Current smoking (yes) | 613 (25.7%) | 339 (25.3%) | 150 (26.2%) | 124 (26.1%) | 0.894 |
| Diabetic duration (years) |  |  |  |  |  |
| < 10.0 | 559 (23.4%) | 311 (23.2%) | 130 (22.7%) | 118 (24.8%) | 0.649 |
| 10.0-19.0 | 1140 (47.7%) | 628 (46.9%) | 285 (49.8%) | 227 (47.7%) |  |
| ≥ 20.0 | 689 (28.9%) | 401 (29.9%) | 157 (27.4%) | 131 (27.5%) |  |
| T2DM treatment |  |  |  |  |  |
| Diet control | 456 (19.1%) | 276 (20.6%) | 104 (18.2%) | 76 (16.0%) | 0.074 |
| Oral anti-diabetes drugs | 753 (31.5%) | 396 (29.6%) | 186 (32.5%) | 171 (35.9%) |  |
| Insulin | 736 (30.8%) | 413 (30.8%) | 186 (32.5%) | 137 (28.8%) |  |
| Oral agents with insulin | 443 (18.6%) | 255 (19.0%) | 96 (16.8%) | 92 (19.3%) |  |
| Family history of T2DM | 367 (15.4%) | 209 (15.6%) | 84 (14.7%) | 74 (15.5%) | 0.873 |
| SBP (mmHg) | 134.00 (120.00, 148.00) | 133.00 (119.00, 145.50) | 134.75 (121.00, 149.00) | 134.00 (120.00,147.50) | 0.195 |
| DBP (mmHg) | 75.50 (68.50, 83.50) | 75.50 (68.00, 84.00) | 76.00 (68.50, 84.00) | 75.50 (68.50,83.00) | 0.374 |
| Comorbidities |  |  |  |  |  |
| Hypertension (yes) | 1151 (48.2%) | 664 (49.6%) | 263 (46.0%) | 224 (47.1%) | 0.307 |
| Hyperlipidemia | 1335 (55.9%) | 745 (55.6%) | 318 (55.6%) | 272 (57.1%) | 0.831 |
| Cancer (yes) | 257 (10.8%) | 153 (11.4%) | 58 (10.1%) | 46 (9.7%) | 0.490 |
| CVD (yes) | 751 (31.4%) | 407 (30.4%) | 186 (32.5%) | 158 (33.2%) | 0.429 |
| Osteoporosis (yes) | 726 (30.4%) | 419 (31.3%) | 164 (28.7%) | 143 (30.0%) | 0.518 |
| Stroke (yes) | 219 (9.2%) | 136 (10.1%) | 45 (7.9%) | 38 (8.0%) | 0.173 |
| DPN (yes) | 438 (18.3%) | 256 (19.1%) | 99 (17.3%) | 83 (17.4%) | 0.552 |
| DN (yes) | 546 (22.9%) | 315 (23.5%) | 125 (21.9%) | 106 (22.3%) | 0.690 |
| DFU (yes) | 53 (2.2%) | 20 (1.5%) | 21 (3.7%) | 12 (2.5%) | 0.011* |
| Medical history |  |  |  |  |  |
| Antihypertensive drug | 1076 (45.1%) | 604 (45.1%) | 265 (46.3%) | 207 (43.5%) | 0.655 |
| Statins | 1290 (54.0%) | 712 (53.1%) | 308 (53.8%) | 270 (56.7%) | 0.401 |
| Antiplatelet drug | 1478 (61.9%) | 828 (61.8%) | 353 (61.7%) | 297 (62.4%) | 0.968 |
| Laboratory parameters |  |  |  |  |  |
| AST (U/L) | 17.00 (8.00, 26.00) | 17.00 (8.00, 26.00) | 17.00 (8.00, 27.00) | 16.00 (8.00,26.00) | 0.722 |
| ALT (U/L) | 19.00 (10.00, 31.00) | 19.00 (11.00, 32.00) | 19.00 (10.00, 31.00) | 20.00 (12.00,30.00) | 0.921 |
| ALB (g/L) | 39.43 (29.92,46.55) | 38.27 (30.22,.93) | 40.40 (30.04, 47.38) | 37.25 (29.31,44.88) | 0.008** |
| FBG (mmol/L) | 7.59 (6.47,9.35) | 7.56 (6.38, 9.21) | 7.61 (6.53, 9.45) | 7.51 (6.31,9.31) | 0.680 |
| HGB (g/L) | 138.00 (126.00, 149.00) | 139.00 (127.00, 150.00) | 137.00 (126.00, 149.00) | 138.00 (126.00,150.00) | 0.365 |
| TC (mmol/L) | 4.96 (4.30, 5.71) | 4.99 (4.26, 5.72) | 4.99 (4.34, 5.73) | 4.99 (4.25,5.71) | 0.832 |
| TG (mmol/L)) | 1.52 (1.08, 2.12) | 1.54 (1.08, 2.18) | 1.51 (1.07, 2.06) | 1.55 (1.09,2.34) | 0.079 |
| HbAIc (%) | 8.60 (7.80, 9.80) | 8.60 (7.80, 9.60) | 8.60 (7.87, 9.90) | 8.60 (7.83,9.80) | 0.329 |
| BUN (mg/dL) | 5.50 (4.60, 6.77) | 5.50 (4.50, 6.70) | 5.52 (4.70, 6.77) | 5.50 (4.60,6.89) | 0.300 |
| UA (μmol/L) | 287.39 (238.00, 350.31) | 285.60 (236.66, 341.38) | 289.17 (238.00, 351.05) | 291.55 (238.00,351.05) | 0.782 |
| HDL-C (mmol/L) | 1.23 (1.06, 1.45) | 1.26 (1.08, 1.47) | 1.23 (1.05, 1.46) | 1.20 (1.02,1.42) | 0.249 |
| IDL-C (mmol/L) | 2.83 (2.29, 3.39) | 2.78 (2.26, 3.39) | 2.88 (2.35, 3.39) | 2.71 (2.20,3.34) | 0.020* |
| TBIL (μmol/L) | 7.00 (4.00, 12.00) | 8.00 (4.00, 12.00) | 7.00 (4.00, 12.00) | 7.00 (4.00,11.00) | 0.795 |
| Scr (μmol/L) | 0.78 (0.68, 0.95) | 0.80 (0.69, 0.96) | 0.78 (0.67, 0.95) | 0.79 (0.69,0.95) | 0.714 |
| SCysC (mg/L) | 0.81 (0.66, 0.95) | 0.82 (0.65, 0.95) | 0.81 (0.66, 0.95) | 0.81 (0.66,0.96) | 0.985 |
| Hs-CRP (mg/L) |  |  |  |  |  |
| < 3 | 2168 (90.8%) | 1227 (91.6%) | 524 (91.6%) | 417 (87.6%) | 0.027* |
| ≥ 3 | 220 (9.2%) | 113 (8.4%) | 48 (8.4%) | 59 (12.4%) |  |
| Neutrophils (*109) | 7.98 (4.55, 11.80) | 8.24 (4.65, 11.71) | 7.87 (4.44, 11.76) | 7.98 (4.91,12.05) | 0.424 |
| Lymphocytes (*109) | 1.96 (1.04,2.91) | 1.94 (1.04, 2.85) | 1.96 (1.04, 2.93) | 1.97 (1.09,2.92) | 0.882 |
| Monocytes (*109) | 0.51 (0.31,0.70) | 0.50 (0.33, 0.70) | 0.50 (0.31, 0.70) | 0.54 (0.32,0.69) | 0.806 |
| Platelets (*109) | 218.48 (123.14,332.79) | 223.74 (125.21, 331.84) | 213.54 (121.20, 332.50) | 226.83 (122.42,335.58) | 0.875 |
| WBC (109/L) | 9.85 (6.35,13.35) | 9.94 (6.40, 13.78) | 9.77 (6.34, 13.29) | 9.93 (6.30,13.19) | 0.874 |
| Neutrophils (%) | 78.00 (64.00,88.00) | 78.00 (59.25, 88.00) | 78.00 (68.00, 88.00) | 77.50 (58.25,88.00) | 0.541 |
| NLR | 4.28 (2.29,7.90) | 4.28 (2.39, 7.61) | 4.29 (2.22, 7.95) | 4.22 (2.38,8.09) | 0.256 |
| PLR | 121.00 (84.00,158.00) | 125.00 (86.25, 160.00) | 118.00 (82.25, 159.00) | 122.00 (86.00,152.00) | 0.386 |
| LMR | 0.26 (0.15,0.48) | 0.26 (0.15, 0.51) | 0.25 (0.15, 0.48) | 0.26 (0.16,0.46) | 0.546 |
| NRAR (mL/g) | 1.91 (1.41,2.55) | 1.91 (1.42, 2.56) | 1.88 (1.40, 2.53) | 1.96 (1.39,2.59) | 0.764 |
| eGFR (ml/min/1.73m2) | 94.98 (85.10,105.99) | 93.61 (84.82, 105.85) | 95.59 (85.33, 106.39) | 94.38 (85.46,105.05) | 0.610 |

**Note.** Continuous variables are expressed as medians (interquartile range) and categorical variables are presented as frequencies (%). **p* < 0.05, ***p* < 0.01, indicate statistical significance.

**Abbreviations:** ALB, albumin; AST, aspartate aminotransferase; ALT, alanine aminotransferase; BMI, body mass index; BUN: blood urea nitrogen; CVD, cardiovascular disease; DBP, diastolic blood pressure; DFU, diabetic foot ulcer; DN, diabetic nephropathy; DR, diabetic retinopathy; DPN, diabetic peripheral neuropathy; GFR, estimated glomerular filtration rate; FBG, fasting blood glucose; HGB, hemoglobin; HbA1c, glycated hemoglobin; HDL-C, high-density lipoprotein cholesterol; LDL-C, low-density lipoprotein cholesterol; LMR, lymphocyte to monocyte ratio; NLR, neutrophil-to-lymphocyte ratio; NPAR, neutrophil percentage-to-albumin ratio; PLR, platelet-to-lymphocyte ratio; Scr, serum creatinine. SBP, systolic blood pressure; TBIL, total bilirubin; TC, total cholesterol; TG, triglyceride; UA, uric acid; WBC, white blood cell.
